# Supplementary material for: Surfaces of silver birch ( Betula pendula ) are sources of biological ice nuclei: in vivo and in situ investigations
Source: Copernicus journal article supplement (doi:10.5194/bg-17-5655-2020), 2020-11-20
Supplement: Supplementary file 1 [file bg-17-5655-2020-supplement.pdf]

Supplement of Biogeosciences, 17, 5655–5667, 2020  
<https://doi.org/10.5194/bg-17-5655-2020-supplement>  
© Author(s) 2020. This work is distributed under  
the Creative Commons Attribution 4.0 License.

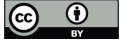

*Supplement of*

## **Surfaces of silver birch (*Betula pendula*) are sources of biological ice nuclei: in vivo and in situ investigations**

**Teresa M. Seifried et al.**

*Correspondence to:* Hinrich Grothe ([hinrich.grothe@tuwien.ac.at](mailto:hinrich.grothe@tuwien.ac.at))

The copyright of individual parts of the supplement might differ from the CC BY 4.0 License.

## Supplementary

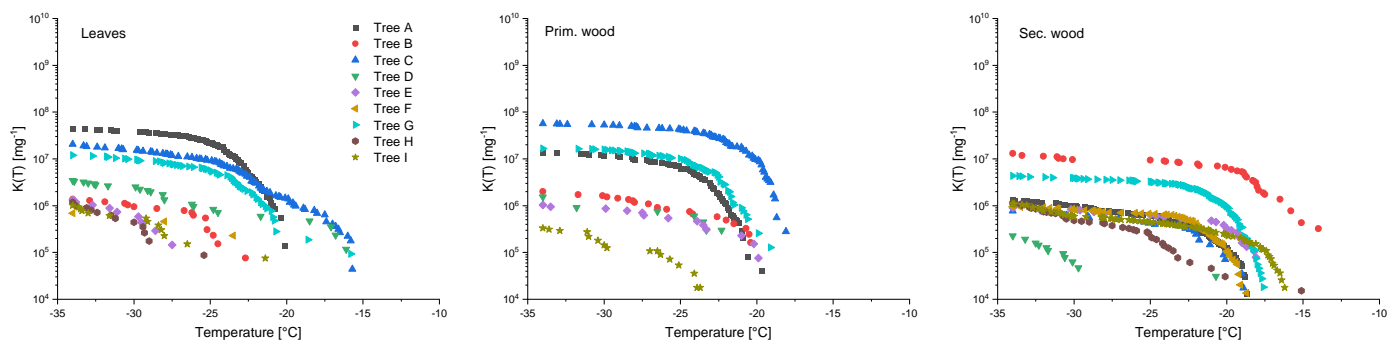

**Figure 7:** Cumulative nucleus concentration  $K(T)$  of extracted INMs from the surface of leaves, primary and secondary wood.  $K(T)$  describes the number of INMs extracted per mg samples. Samples originate from nine different birches in Tyrol (Tree A to I).

5

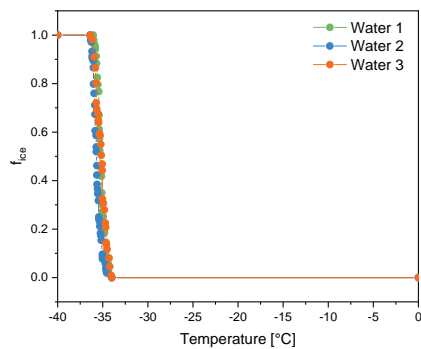

**Figure 8:** Ice nucleation curve of ultra-pure water (3 measurements), recorded with VODCA.
